# Supplementary material for: Evaluating CXCR6 and its ligand CXCL16 as biomarkers for lupus organ involvement: a mini review and brief research report
Source: Frontiers journal article supplement (doi:10.3389/flupu.2025.1645416), 2025-08-29

Supplementary Material

# Supplementary Table 1

**CXCR6 and CXCL16 Search Strategy**

**PubMed MEDLINE**

(((((((((((((((((((((((((((((Chronic Cutaneous Lupus Erythematosus) OR (Cutaneous Lupus Erythematosus)) OR (Cutaneous Lupus)) OR (Discoid Lupus Erythematosus)) OR (Lupus)) OR (Lupus Erythematosus Disseminatus)) OR (Lupus Erythematosus Panniculitides)) OR (Lupus erythematosus panniculitis)) OR (Lupus Erythematosus Profundus)) OR (Lupus Glomerulonephritides)) OR (Lupus Glomerulonephritis)) OR (Lupus Nephritides)) OR (Lupus Nephritis)) OR (Lupus Panniculitides)) OR (Lupus Profundus)) OR (Subacute Cutaneous Lupus Erythematosus)) OR (Systemic lupus erythematosus)) OR (Central Nervous System Lupus Vasculitis)) OR (Central Nervous System Lupus)) OR (Central Nervous System Systemic Lupus Erythematosis)) OR (Neuropsychiatric Systemic Lupus Erythematosus)) OR (Lupus Meningoencephalitis)) OR (Lupus Meningoencephalitides)) OR ("Lupus Erythematosus, Cutaneous"[Mesh])) OR ("Lupus Erythematosus, Discoid"[Mesh])) OR ("Lupus Erythematosus, Systemic"[Mesh])) OR ("Lupus Nephritis"[Mesh])) OR ("Panniculitis, Lupus Erythematosus"[Mesh])) OR ("Lupus Vasculitis, Central Nervous System"[Mesh])) AND ((((((((((((((((((((((Bonzo receptor) OR (BONZO)) OR (CD186)) OR (CDw186)) OR (Chemokine CXCL16)) OR (CXC Chemokine Ligand 16)) OR (CXC Chemokine receptor 6)) OR (CXCL16)) OR (CXCR6)) OR (Inflammatory soluble chemokine CXC motif ligand 16)) OR (sCXCL16)) OR (Serum CXCL16)) OR (Serum soluble chemokine ligand 16)) OR (SRPSOX)) OR (SR-PSOX)) OR (STRL33)) OR (TYMSTR)) OR (Urinary CXCL16)) OR ("Chemokine CXCL16"[Mesh])) OR ("CXCL16 protein, human" [Supplementary Concept])) OR ("Receptors, CXCR6"[Mesh])) OR ("Scavenger Receptors, Class E"[Mesh]))

**20 results**, uploaded to Covidence 8/21/23

**Scopus**

( TITLE-ABS-KEY ( ( ( ( ( ( ( ( ( ( ( ( ( ( ( ( ( ( ( ( ( ( ( ( ( ( ( ( ( chronic AND cutaneous AND lupus AND erythematosus ) OR ( cutaneous AND lupus AND erythematosus ) ) OR ( cutaneous AND lupus ) ) OR ( discoid AND lupus AND erythematosus ) ) OR ( lupus ) ) OR ( lupus AND erythematosus AND disseminatus ) ) OR ( lupus AND erythematosus AND panniculitides ) ) OR ( lupus AND erythematosus AND panniculitis ) ) OR ( lupus AND erythematosus AND profundus ) ) OR ( lupus AND glomerulonephritides ) ) OR ( lupus AND glomerulonephritis ) ) OR ( lupus AND nephritides ) ) OR ( lupus AND nephritis ) ) OR ( lupus AND panniculitides ) ) OR ( lupus AND profundus ) ) OR ( subacute AND cutaneous AND lupus AND erythematosus ) ) OR ( systemic AND lupus AND erythematosus ) ) OR ( central AND nervous AND system AND lupus AND vasculitis ) ) OR ( central AND nervous AND system AND lupus ) ) OR ( central AND nervous AND system AND systemic AND lupus AND erythematosis ) ) OR ( neuropsychiatric AND systemic AND lupus AND erythematosus ) ) OR ( lupus AND meningoencephalitis ) ) OR ( lupus AND meningoencephalitides ) ) OR ( "Lupus Erythematosus, Cutaneous" [mesh] ) ) OR ( "Lupus Erythematosus, Discoid" [mesh] ) ) OR ( "Lupus Erythematosus, Systemic" [mesh] ) ) OR ( "Lupus Nephritis" [mesh] ) ) OR ( "Panniculitis, Lupus Erythematosus" [mesh] ) ) OR ( "Lupus Vasculitis, Central Nervous System" [mesh] ) ) ) AND ( TITLE-ABS-KEY ( ( ( ( ( ( ( ( ( ( ( ( ( ( ( ( ( ( ( ( ( ( bonzo AND receptor ) OR ( bonzo ) ) OR ( cd186 ) ) OR ( cdw186 ) ) OR ( chemokine AND cxcl16 ) ) OR ( cxc AND chemokine AND ligand 16 ) ) OR ( cxc AND chemokine AND receptor 6 ) ) OR ( cxcl16 ) ) OR ( cxcr6 ) ) OR ( inflammatory AND soluble AND chemokine AND cxc AND motif AND ligand 16 ) ) OR ( scxcl16 ) ) OR ( serum AND cxcl16 ) ) OR ( serum AND soluble AND chemokine AND ligand 16 ) ) OR ( srpsox ) ) OR ( sr-psox ) ) OR ( strl33 ) ) OR ( tymstr ) ) OR ( urinary AND cxcl16 ) ) OR ( "Chemokine CXCL16" [mesh] ) ) OR ( "CXCL16 protein, human" [supplementary AND concept] ) ) OR ( "Receptors, CXCR6" [mesh] ) ) OR ( "Scavenger Receptors, Class E" [mesh] ) ) ) AND ( LIMIT-TO ( LANGUAGE , "English" ) ) AND ( LIMIT-TO ( EXACTKEYWORD , "Human" ) OR LIMIT-TO ( EXACTKEYWORD , "Humans" ) )

**58 results**, uploaded to Covidence 8/21/23

**Ovid MEDLINE**

Ovid MEDLINE(R) ALL <1946 to August 18, 2023>

1 (Chronic Cutaneous Lupus Erythematosus or Cutaneous Lupus Erythematosus or Cutaneous Lupus or Discoid Lupus Erythematosus or Lupus or Lupus Erythematosus Disseminatus or Lupus Erythematosus Panniculitides or Lupus erythematosus panniculitis or Lupus Erythematosus Profundus or Lupus Glomerulonephritides or Lupus Glomerulonephritis or Lupus Nephritides or Lupus Nephritis or Lupus Panniculitides or Lupus Profundus or Subacute Cutaneous Lupus Erythematosus or Systemic lupus erythematosus or Central Nervous System Lupus Vasculitis or Central Nervous System Lupus or Central Nervous System Systemic Lupus Erythematosis or Neuropsychiatric Systemic Lupus Erythematosus or Lupus Meningoencephalitis or Lupus Meningoencephalitides).af. or ("Lupus Erythematosus, Cutaneous" or "Lupus Erythematosus, Discoid" or "Lupus Erythematosus, Systemic" or "Lupus Nephritis" or "Panniculitis, Lupus Erythematosus" or "Lupus Vasculitis, Central Nervous System").sh. 103813

2 (Bonzo receptor or BONZO or CD186 or CDw186 or Chemokine CXCL16 or CXC Chemokine Ligand 16 or CXC Chemokine receptor 6 or CXCL16 or CXCR6 or Inflammatory soluble chemokine CXC motif ligand 16 or sCXCL16 or Serum CXCL16 or Serum soluble chemokine ligand 16 or SRPSOX or SR-PSOX or STRL33 or TYMSTR or Urinary CXCL16).af. or ("Chemokine CXCL16" or "CXCL16 protein, human" or "Receptors, CXCR6" or "Scavenger Receptors, Class E").sh. 2638

3 1 and 2 20

**20 Results,** uploaded to Covidence 8/21/23

**Cochrane library**

Search Name: kernizan and richmond CXCL16

Date Run: 23/08/2023 21:27:42

Comment:

ID Search Hits

#1 (Chronic Cutaneous Lupus Erythematosus OR Cutaneous Lupus Erythematosus OR Cutaneous Lupus OR Discoid Lupus Erythematosus OR Lupus OR Lupus Erythematosus Disseminatus OR Lupus Erythematosus Panniculitides OR Lupus erythematosus panniculitis OR Lupus Erythematosus Profundus OR Lupus Glomerulonephritides OR Lupus Glomerulonephritis OR Lupus Nephritides OR Lupus Nephritis OR Lupus Panniculitides OR Lupus Profundus OR Subacute Cutaneous Lupus Erythematosus OR Systemic lupus erythematosus OR Central Nervous System Lupus Vasculitis OR Central Nervous System Lupus OR Central Nervous System Systemic Lupus Erythematosis OR Neuropsychiatric Systemic Lupus Erythematosus OR Lupus Meningoencephalitis OR Lupus Meningoencephalitides):ti,ab,kw 4060

#2 MeSH descriptor: [Lupus Erythematosus, Cutaneous] this term only 49

#3 MeSH descriptor: [Lupus Erythematosus, Discoid] this term only 32

#4 MeSH descriptor: [Lupus Erythematosus, Systemic] this term only 1154

#5 MeSH descriptor: [Lupus Nephritis] this term only 334

#6 MeSH descriptor: [Panniculitis, Lupus Erythematosus] this term only 0

#7 MeSH descriptor: [Lupus Vasculitis, Central Nervous System] this term only 3

#8 #1 OR #2 OR #3 OR #4 OR #5 OR #6 OR #7 4060

#9 Bonzo receptor OR BONZO OR CD186 OR CDw186 OR Chemokine CXCL16 OR CXC Chemokine Ligand 16 OR CXC Chemokine receptor 6 OR CXCL16 OR CXCR6 OR Inflammatory soluble chemokine CXC motif ligand 16 OR sCXCL16 OR Serum CXCL16 OR Serum soluble chemokine ligand 16 OR SRPSOX OR SR-PSOX OR STRL33 OR TYMSTR OR Urinary CXCL16 113

#10 MeSH descriptor: [Chemokine CXCL16] this term only 5

#11 MeSH descriptor: [Receptors, CXCR6] this term only 1

#12 MeSH descriptor: [Scavenger Receptors, Class E] this term only 11

#13 #9 OR #10 OR #11 OR #12 124

#14 #8 AND #13 3

**3 results**, uploaded to Covidence 8/23/23

Search Name: Cochrane library re-run, exact phrase, MeSH term explosion

Date Run: 23/08/2023 21:53:09

Comment:

ID Search Hits

#1 "Chronic Cutaneous Lupus Erythematosus" OR

"Cutaneous Lupus Erythematosus"  OR

"Cutaneous Lupus" OR "Discoid Lupus Erythematosus" OR "Lupus" OR "Lupus Erythematosus Disseminatus" OR "Lupus Erythematosus Panniculitides" OR "Lupus erythematosus panniculitis" OR "Lupus Erythematosus Profundus" OR "Lupus Glomerulonephritides" OR "

Lupus Glomerulonephritis" OR "Lupus Nephritides" OR "Lupus Nephritis" OR "Lupus Panniculitides" OR "Lupus Profundus" OR "Subacute Cutaneous Lupus Erythematosus" OR "Systemic lupus erythematosus" OR "Central Nervous System Lupus Vasculitis" OR

"Central Nervous System Lupus" OR "Central Nervous System Systemic Lupus Erythematosis" OR "Neuropsychiatric Systemic Lupus Erythematosus" OR "Lupus Meningoencephalitis" OR "Lupus Meningoencephalitides" 4262

#2 MeSH descriptor: [Lupus Erythematosus, Cutaneous] explode all trees 75

#3 MeSH descriptor: [Lupus Erythematosus, Discoid] explode all trees 32

#4 MeSH descriptor: [Lupus Erythematosus, Systemic] explode all trees 1437

#5 MeSH descriptor: [Lupus Nephritis] explode all trees 334

#6 MeSH descriptor: [Panniculitis, Lupus Erythematosus] explode all trees 0

#7 MeSH descriptor: [Lupus Vasculitis, Central Nervous System] explode all trees 3

#8 #2 OR #3 OR #4 OR #5 OR #6 OR #7 1469

#9 #1 OR #8 4262

#10 "Bonzo receptor" OR "BONZO" OR "CD186" OR "CDw186" OR "Chemokine CXCL16" OR "CXC Chemokine Ligand 16" OR "CXC Chemokine receptor 6" OR "CXCL16" OR "CXCR6" OR "Inflammatory soluble chemokine CXC motif-ligand 16" OR "Scavenger Receptor For Phosphatidylserine And Oxidized Low Density Lipoprotein" OR "sCXCL16" OR "Serum CXCL16" OR "Serum soluble chemokine ligand 16" OR "SRPSOX" OR "SR-PSOX" 52

#11 MeSH descriptor: [Chemokine CXCL16] explode all trees 5

#12 MeSH descriptor: [Receptors, CXCR6] explode all trees 1

#13 MeSH descriptor: [Scavenger Receptors, Class E] explode all trees 16

#14 #11 OR #12 OR #13 16

#15 #10 OR #14 63

#16 #9 AND #15 2

**2 results**, uploaded to Covidence 8/23/23


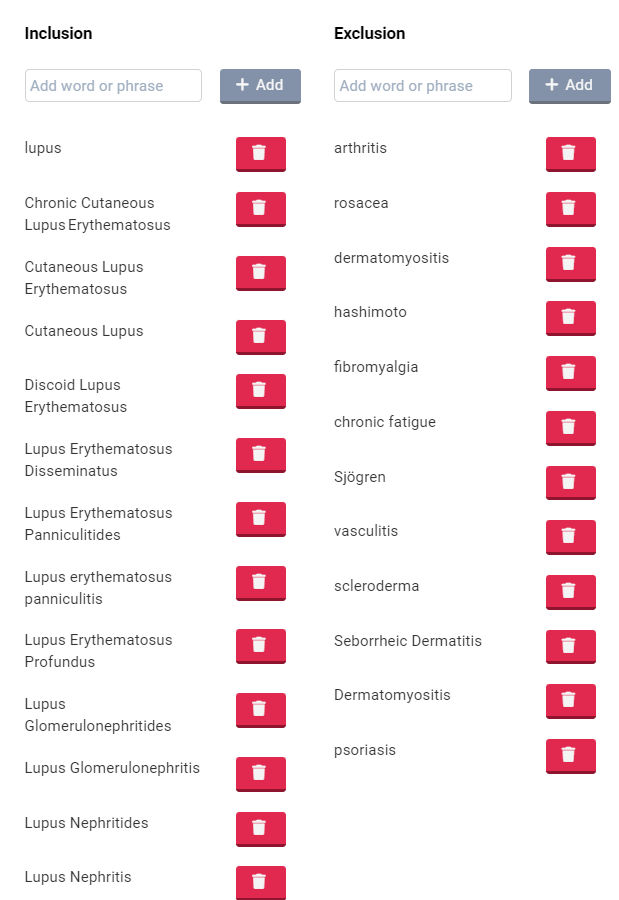

Supplement: Table_1.docx [file Table_1.docx]
